# Supplementary material
Source: HighWire-hosted journal article supplement (https://le.uwpress.org/content/suppl/2026/04/14/le.102.4.011525-0001R1)
Supplement: LE-102-4-Chen-appA.pdf [file LE-102-4-Chen-appA.pdf]

## Appendix A

Figure A1: An Example of the Choice Experiment Scenario Shown to Participants

8. Suppose your jurisdiction is considering a **utility-scale solar project** that will have **50 MW** of nameplate capacity, run for 25 years, generate electricity to serve about 8,500 homes, and occupy 375 acres of farmland.

There are 2 potential plans, Plan A and Plan B, for the solar project that are the same except for the **life-cycle carbon emissions reduction, lease payment to landowners, savings on the electricity bill, and land quality of the occupied farmland**. Based on data from the Energy Information Administration, the average monthly electricity bill for residential customers in Iowa is \$110. Land quality is based on the index, Corn Suitability Rating 2 (CSR2) that ranges from 5 to 100. The state average CSR2 values for high-, medium- and low-quality land are about 85, 70, and 55, respectively.

In the following, we ask you to choose whether you prefer Plan A or Plan B in 6 scenarios.

| Scenario 1                                                              | Plan A                       | Plan B                       |
|-------------------------------------------------------------------------|------------------------------|------------------------------|
| Expected carbon emissions reduction relative to coal-fired power plants | 85%                          | 95%                          |
| Expected annual lease payment to landowners                             | 6 times prevailing cash rent | 4 times prevailing cash rent |
| Expected savings on the monthly electricity bill for your household     | \$25                         | \$40                         |
| Land quality of the occupied farmland                                   | Low (CSR2=55)                | Medium (CSR2=70)             |
| Which plan are you more likely to support in your jurisdiction?         | <input type="checkbox"/>     | <input type="checkbox"/>     |

How certain are you of your choice, on a scale of 1 to 5? (1 = very uncertain; 5 = very certain)

1                       2                       3                       4                       5

Figure A2: Perceived Benefits and Challenges of Utility-Scale Solar Projects for Local Communities

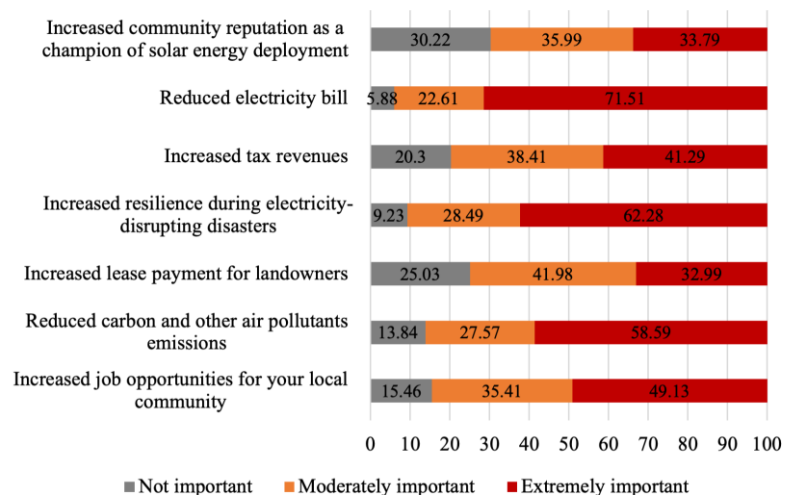

(a) Rating of Perceived Benefits

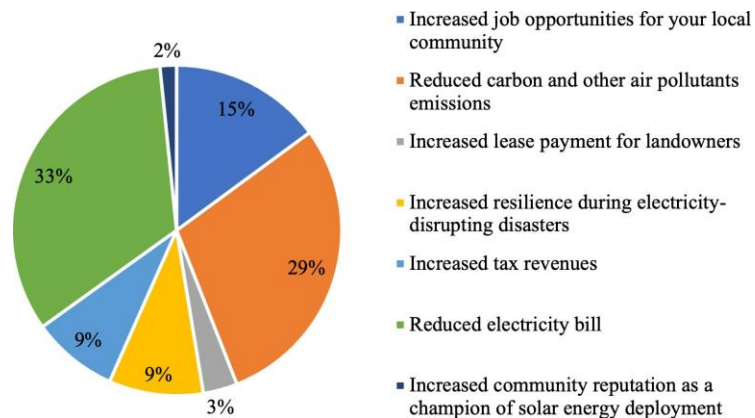

(c) Rating of the Most Important Benefit

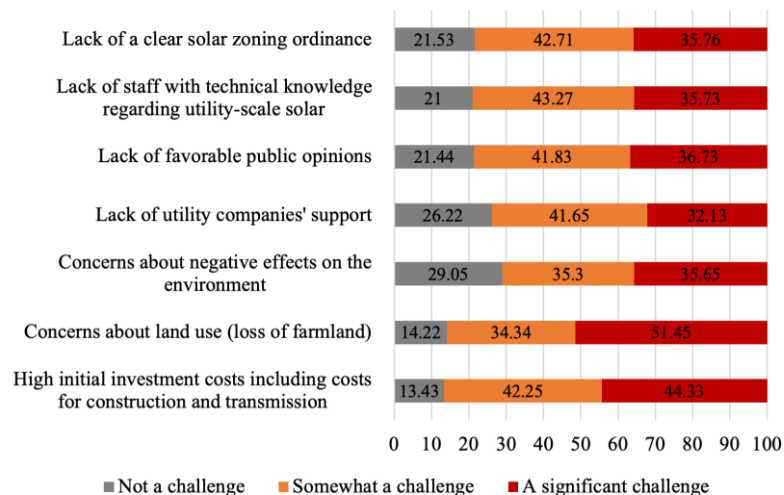

(b) Rating of Perceived Challenges

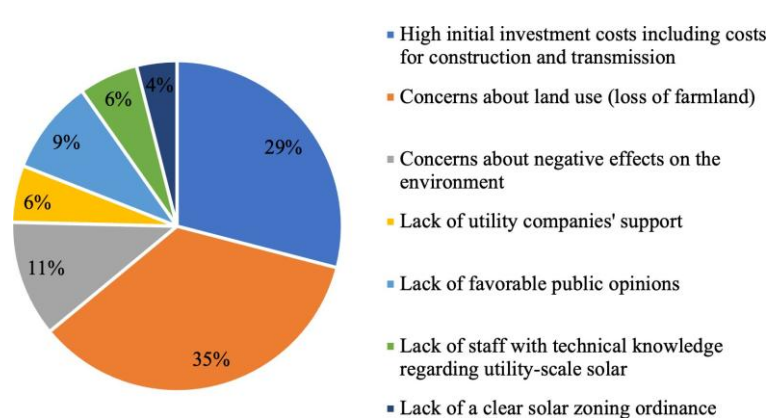

(d) Rating of the Most Important Challenge

Table A1: Experimental Design of Information Treatments

|             | Control group                       | Treatment groups                                                                                                                                                                                                                                                                                                                                                                                                                                                                                                                                                                                                                                                                                                          |                                                                                                                                                                                                                                                                                                                                                                                                                                                          |                                                                                                                                                                                                                                                                                                                                                                                                                                       |
|-------------|-------------------------------------|---------------------------------------------------------------------------------------------------------------------------------------------------------------------------------------------------------------------------------------------------------------------------------------------------------------------------------------------------------------------------------------------------------------------------------------------------------------------------------------------------------------------------------------------------------------------------------------------------------------------------------------------------------------------------------------------------------------------------|----------------------------------------------------------------------------------------------------------------------------------------------------------------------------------------------------------------------------------------------------------------------------------------------------------------------------------------------------------------------------------------------------------------------------------------------------------|---------------------------------------------------------------------------------------------------------------------------------------------------------------------------------------------------------------------------------------------------------------------------------------------------------------------------------------------------------------------------------------------------------------------------------------|
|             |                                     | Treatment 1                                                                                                                                                                                                                                                                                                                                                                                                                                                                                                                                                                                                                                                                                                               | Treatment 2                                                                                                                                                                                                                                                                                                                                                                                                                                              | Treatment 3                                                                                                                                                                                                                                                                                                                                                                                                                           |
| Treatment   | No information                      | Peers’ information                                                                                                                                                                                                                                                                                                                                                                                                                                                                                                                                                                                                                                                                                                        | Positive information                                                                                                                                                                                                                                                                                                                                                                                                                                     | Negative information                                                                                                                                                                                                                                                                                                                                                                                                                  |
| Description | No                                  | Approximately 25% of the townships/counties in Midwestern states have zoning ordinances regarding utility-scale solar systems, and increasingly more jurisdictions have adopted utility-scale solar zoning ordinances. According to the Solar Model Ordinances published by the Great Plain Institutes, the most commonly used setback distance from the property line of a nonparticipating parcel in Midwestern states is 150 feet. The requirement for a decommissioning bond (financial assurance to restore the land to its original status) is project specific. Based on our studies, the decommissioning bond to cover the full restoration cost is approximately \$3,500 per acre on average across the Midwest. | While some people oppose building utility-scale solar systems, studies have shown that such systems provide great benefits in reducing greenhouse gas (GHG) emissions (90% CO2 emissions reduction relative to coal-fired electricity generation), mitigating other air pollutants such as NOx (2.4 lbs/MWh from coal-fired electricity generation), creating job opportunities and tax revenues, reducing energy costs, and dependency on fossil fuels. | While some people support building utility-scale solar systems, studies have shown that such systems result in adverse impacts to local communities, such as interference with existing land uses (e.g., occupying prime farmland, 5-10 acres per MW), alteration of topsoil conditions and drainage channels during construction (e.g., increased runoff and erosion), loss of wildlife habitats, and aesthetic issues to neighbors. |
| Questions   | Attention-checking questions        |                                                                                                                                                                                                                                                                                                                                                                                                                                                                                                                                                                                                                                                                                                                           |                                                                                                                                                                                                                                                                                                                                                                                                                                                          |                                                                                                                                                                                                                                                                                                                                                                                                                                       |
|             | Perception and preference questions |                                                                                                                                                                                                                                                                                                                                                                                                                                                                                                                                                                                                                                                                                                                           |                                                                                                                                                                                                                                                                                                                                                                                                                                                          |                                                                                                                                                                                                                                                                                                                                                                                                                                       |

Note: Participants were randomly assigned to one of four groups (1 control, 3 treatment groups), with each participant seeing only one information description. Following the information description, respondents were tested about the information provided to ensure that they had read the information provided. Specifically, each individual was presented with two questions concerning the information provided, the survey instrument explicitly stated that the answers to these questions appeared in the paragraph of description. Three attempts were allowed, those who failed the test after all 3 attempts were not allowed to continue the survey and so were excluded from our study. Respondents who passed the test were presented with questions about their perceptions, and preferences regarding utility-scale solar energy and six discrete choice scenarios.

Table A2: Landownership by Information Treatment and Sample

| Landownership             | No information | Peer information | Positive information | Negative information |
|---------------------------|----------------|------------------|----------------------|----------------------|
| <b>Public officials</b>   |                |                  |                      |                      |
| - Landowner               | 20             | 14               | 16                   | 19                   |
| - Non-landowner           | 25             | 31               | 27                   | 28                   |
| <b>General population</b> |                |                  |                      |                      |
| - Landowner               | 24             | 21               | 14                   | 14                   |
| - Non-landowner           | 150            | 164              | 156                  | 143                  |

Note: We conducted Pearson chi-square tests to test for balance across treatment groups. The results suggest that there are no statistically significant differences in landownership representation across information treatments for both public official sample ( $\chi^2 = 1.81$ ,  $p$ -value = 0.61), and the general population sample ( $\chi^2 = 3.44$ ,  $p$ -value = 0.33).

Table A3: Heterogeneity Analysis: Latent Class Model Results in Preference Space

|                                   | <b>Class 1</b><br>Cost-Conscious<br>Acceptor | <b>Class 2</b><br>Strong Land<br>Stewards | <b>Class 3</b><br>Solar Advocates |
|-----------------------------------|----------------------------------------------|-------------------------------------------|-----------------------------------|
| <b>Class share</b>                | 46.5%                                        | 32.9%                                     | 20.6%                             |
| Carbon emission reduction 95%     | 0.2909**<br>(0.1238)                         | -0.3960***<br>(0.1247)                    | 0.8661***<br>(0.1284)             |
| Lease payment to landowners       | 0.026<br>(0.0371)                            | -0.0874***<br>(0.0327)                    | 0.1564***<br>(0.0591)             |
| Energy saving on electricity bill | 0.0875***<br>(0.0062)                        | -0.003<br>(0.0057)                        | -0.0059<br>(0.0101)               |
| Medium quality farmland           | -0.2271*<br>(0.1161)                         | -0.6662***<br>(0.1304)                    | 0.4401**<br>(0.1927)              |
| High quality farmland             | -0.8896***<br>(0.2247)                       | -2.2668***<br>(0.2688)                    | 1.0672***<br>(0.3676)             |
| <b>Cluster membership:</b>        |                                              |                                           |                                   |
| Landownership                     | 0.1099<br>(0.3904)                           | 0.8922**<br>(0.3528)                      |                                   |
| Knowledge_utility_solar           | -0.8366***<br>(0.2549)                       | -0.3834<br>(0.2485)                       |                                   |
| County_utility_solar              | -0.2178<br>(0.3079)                          | -0.2221<br>(0.3210)                       |                                   |
| Rooftop_adopt_plan                | -0.2357<br>(0.2676)                          | -0.6259**<br>(0.2893)                     |                                   |
| Community_part_int                | -0.1845<br>(0.2096)                          | -0.5433**<br>(0.2180)                     |                                   |
| Constant                          | 2.3323***<br>(0.5717)                        | 2.0750***<br>(0.5689)                     |                                   |
| Log likelihood                    | -2,596                                       |                                           |                                   |
| AIC                               | 5245.410                                     |                                           |                                   |
| BIC                               | 5437.441                                     |                                           |                                   |
| Certainty level $\geq 3$          | Yes                                          |                                           |                                   |
| Number of respondents             | 816                                          |                                           |                                   |
| Observations                      | 9066                                         |                                           |                                   |

Note: Based on the Bayesian Information Criterion (BIC) statistics, we selected a model with 3 classes. The class assignment was determined by several factors: landownership, knowledge levels directly related to utility-scale solar energy, the presence of utility-scale solar projects in the respondent’s county of residence, and participation in or interest in rooftop and community solar projects. Robust standard errors in parentheses, \*  $p < 0.1$ , \*\*  $p < 0.05$ , \*\*\*  $p < 0.01$ .

Table A4: Heterogeneity Analysis: Latent Class Model Results in Preference Space (Covariate-Free Specification)

|                                   | <b>Class 1</b><br>Cost-Conscious<br>Acceptor | <b>Class 2</b><br>Strong Land<br>Stewards | <b>Class 3</b><br>Solar Advocates |
|-----------------------------------|----------------------------------------------|-------------------------------------------|-----------------------------------|
| <b>Class share</b>                | 43.8%                                        | 34.3%                                     | 22%                               |
| Carbon emission reduction 95%     | 0.1757<br>(0.1493)                           | -0.3576***<br>(0.1151)                    | 0.9694***<br>(0.1646)             |
| Lease payment to landowners       | -0.0142<br>(0.0606)                          | -0.0954***<br>(0.0310)                    | 0.2268***<br>(0.0753)             |
| Energy saving on electricity bill | 0.0877***<br>(0.0060)                        | -0.0036<br>(0.0054)                       | 0.0055<br>(0.0139)                |
| Medium quality farmland           | -0.2375**<br>(0.1198)                        | -0.5584***<br>(0.1356)                    | 0.2625<br>(0.2391)                |
| High quality farmland             | -0.8319***<br>(0.2314)                       | -2.1526***<br>(0.2526)                    | 0.8534**<br>(0.4196)              |
| <b>Cluster membership:</b>        |                                              |                                           |                                   |
| Constant                          | 0.6902***<br>(0.2223)                        | 0.4447**<br>(0.1779)                      |                                   |
| Log likelihood                    | -2,618                                       |                                           |                                   |
| AIC                               | 5270.703                                     |                                           |                                   |
| BIC                               | 5391.612                                     |                                           |                                   |
| Certainty level $\geq 3$          | Yes                                          |                                           |                                   |
| Number of respondents             | 816                                          |                                           |                                   |
| Observations                      | 9066                                         |                                           |                                   |

Note: Robust standard errors in parentheses, \*  $p < 0.1$ , \*\*  $p < 0.05$ , \*\*\*  $p < 0.01$ .

Table A5: Generalized Multinomial Logit Models in Willingness-to-Pay Space: Accounting for Scale Heterogeneity

| Variable                             | (1)                     |
|--------------------------------------|-------------------------|
| <b>Mean parameters</b>               |                         |
| Carbon emission reduction 95%        | 3.1627***<br>(1.2042)   |
| Lease payment to landowners          | 0.3753<br>(0.4212)      |
| Medium quality farmland              | -5.0097***<br>(1.5584)  |
| High quality farmland                | -20.3812***<br>(2.1961) |
| <b>Standard deviation parameters</b> |                         |
| Carbon emission reduction 95%        | 2.5958<br>(1.6487)      |
| Lease payment to landowners          | 0.5745*<br>(0.3049)     |
| Medium quality farmland              | 4.5199*<br>(2.4876)     |
| High quality farmland                | 16.5922*<br>(9.3193)    |
| $\tau$                               | 1.1237**<br>(0.4469)    |
| Log likelihood                       | -2,657                  |
| AIC                                  | 5335.986                |
| BIC                                  | 5414.221                |
| Certainty level $\geq 3$             | Yes                     |
| Number of respondents                | 816                     |
| Observations                         | 9066                    |

Note: Column (1) excludes responses with a high level of uncertainty. Robust standard errors clustered at the individual level in parentheses, \*  $p < 0.1$ , \*\*  $p < 0.05$ , \*\*\*  $p < 0.01$ .

Table A6: Random Parameter Logit Models in Willingness-to-Pay Space: Addressing Respondent Uncertainty in Choice Decisions

| Variable                             | (1)                     | (2)                   |
|--------------------------------------|-------------------------|-----------------------|
| <b>Mean parameters</b>               |                         |                       |
| Carbon emission reduction 95%        | 2.3631*<br>(1.3956)     | -15.0500<br>(23.5579) |
| Lease payment to landowners          | 0.3552<br>(0.4483)      | 2.5413<br>(4.5669)    |
| Medium quality farmland              | -4.7723***<br>(1.4926)  | -20.6091<br>(18.8935) |
| High quality farmland                | -23.1676***<br>(2.6863) | -95.7955<br>(58.8344) |
| <b>Standard deviation parameters</b> |                         |                       |
| Carbon emission reduction 95%        | 1.4524***<br>(0.1203)   | 19.8803<br>(22.9839)  |
| Lease payment to landowners          | 0.4544***<br>(0.0378)   | 5.1068<br>(4.0797)    |
| Medium quality farmland              | 1.6033***<br>(0.1373)   | 24.2515<br>(22.7995)  |
| High quality farmland                | 3.5987***<br>(0.3439)   | 82.4078<br>(93.0663)  |
| Log likelihood                       | -3,082                  | -394                  |
| AIC                                  | 6184.272                | 807.329               |
| BIC                                  | 6256.719                | 858.906               |
| Number of respondents                | 865                     | 221                   |
| Observations                         | 10350                   | 1284                  |

Note: Column (1) uses the same specification as Column (2) in Table 3 but includes observations with high levels of uncertainty (certainty level = 1 or 2). Column (2) only includes observations from respondents who reported a higher level of uncertainty. Robust standard errors clustered at the individual level in parentheses, \*  $p < 0.1$ , \*\*  $p < 0.05$ , \*\*\*  $p < 0.01$ .

Table A7: Random Parameter Logit Models in Willingness-to-Pay Space: Accounting for Potentially Unreliable Responses

| Variable                             | (1)                     | (2)                     |
|--------------------------------------|-------------------------|-------------------------|
| <b>Mean parameters</b>               |                         |                         |
| Carbon emission reduction 95%        | 2.8024**<br>(1.3147)    | 3.0126**<br>(1.3830)    |
| Lease payment to landowners          | 0.1593<br>(0.4323)      | 0.2703<br>(0.4586)      |
| Medium quality farmland              | -4.4437***<br>(1.4079)  | -4.8799***<br>(1.4613)  |
| High quality farmland                | -21.1795***<br>(2.5524) | -21.5898***<br>(2.6741) |
| <b>Standard deviation parameters</b> |                         |                         |
| Carbon emission reduction 95%        | 1.3891***<br>(0.1218)   | 1.4810***<br>(0.1394)   |
| Lease payment to landowners          | 0.4349***<br>(0.0382)   | 0.4642***<br>(0.0438)   |
| Medium quality farmland              | 1.5151***<br>(0.1373)   | 1.5937***<br>(0.1577)   |
| High quality farmland                | 3.4501***<br>(0.3463)   | 3.6780***<br>(0.4015)   |
| Log likelihood                       | -2,577                  | -2,187                  |
| AIC                                  | 5173.758                | 4394.015                |
| BIC                                  | 5244.640                | 4463.322                |
| Certainty level $\geq 3$             | Yes                     | Yes                     |
| Number of respondents                | 798                     | 684                     |
| Observations                         | 8850                    | 7560                    |

Note: Column (1) uses the same specification as Column (2) in Table 3 but excludes respondents who always selected either Project A or Project B across all six choice scenarios. Compared to Column (1), Column (2) further excludes respondents who completed the survey in less than ten minutes. Note that both columns exclude responses with a higher level of uncertainty. Robust standard errors clustered at the individual level in parentheses, \*  $p < 0.1$ , \*\*  $p < 0.05$ , \*\*\*  $p < 0.01$ .

Table A8: Random Parameter Logit Models in Preference Space: Sub-sample Regressions based on the Rating of Perceived Benefits and Challenges

| Variable                             | Carbon reduction<br>(1) | Lease payment<br>(2)   | Energy saving<br>(3)   | Loss of farmland<br>(4) |
|--------------------------------------|-------------------------|------------------------|------------------------|-------------------------|
| <b>Mean parameters</b>               |                         |                        |                        |                         |
| Carbon emission reduction 95%        | 0.5361***<br>(0.1127)   | 0.4019***<br>(0.1327)  | 0.2113**<br>(0.0960)   | 0.049<br>(0.1308)       |
| Lease payment to landowners          | 0.003<br>-0.0336        | 0.2141***<br>-0.0417   | 0.014<br>-0.0294       | 0.0318<br>-0.0416       |
| Energy saving on electricity bill    | 0.0603***<br>(0.0063)   | 0.0556***<br>(0.0076)  | 0.0653***<br>(0.0061)  | 0.0587***<br>(0.0077)   |
| Medium quality farmland              | -0.0802<br>(0.1170)     | -0.1822<br>(0.1511)    | -0.0663<br>(0.1055)    | -0.4900***<br>(0.1391)  |
| High quality farmland                | -0.9238***<br>(0.2046)  | -0.8477***<br>(0.2532) | -0.8018***<br>(0.1832) | -1.6839***<br>(0.2861)  |
| <b>Standard deviation parameters</b> |                         |                        |                        |                         |
| Carbon emission reduction 95%        | 1.3469***<br>(0.1577)   | 1.1592***<br>(0.1938)  | 1.1477***<br>(0.1367)  | 1.3814***<br>(0.1947)   |
| Lease payment to landowners          | -0.4085***<br>(0.0532)  | 0.3093***<br>(0.0668)  | 0.3612***<br>(0.0498)  | -0.4651***<br>(0.0690)  |
| Energy saving on electricity bill    | -0.0694***<br>(0.0069)  | -0.0619***<br>(0.0090) | 0.0759***<br>(0.0066)  | -0.0829***<br>(0.0100)  |
| Medium quality farmland              | -0.6742***<br>(0.2077)  | -0.6455**<br>(0.3037)  | 0.5794***<br>(0.2126)  | 0.9413***<br>(0.2778)   |
| High quality farmland                | 1.7860***<br>(0.2534)   | 1.8368***<br>(0.3229)  | 1.7465***<br>(0.2157)  | 2.8615***<br>(0.4257)   |
| Log likelihood                       | -1,638                  | -939                   | -1,944                 | -1,386                  |
| AIC                                  | 3363.043                | 1957.675               | 3975.515               | 2856.511                |
| BIC                                  | -1,638                  | -939                   | -1,944                 | -1,386                  |
| Certainty level $\geq 3$             | Yes                     | Yes                    | Yes                    | Yes                     |
| Number of respondents                | 488                     | 275                    | 598                    | 426                     |
| Observations                         | 5524                    | 3134                   | 6698                   | 4746                    |

Note: Sub-sample construction was based on respondents’ ratings of perceived benefits and challenges associated with utility-scale solar energy systems in their local communities. The four subsamples comprised respondents who rated each of the following as “very important” or “extremely important”: carbon emission reductions (column (1)), lease payments to landowners (column (2)), household energy savings on electricity bills (column (3)), or loss of farmland quality (column (4)). Robust standard errors clustered at the individual level in parentheses, \*  $p < 0.1$ , \*\*  $p < 0.05$ , \*\*\*  $p < 0.01$ .

Table A9: Random Parameter Logit Models in Willingness-to-Pay Space: Excluding Paper Copy Responses

| Variable                                        | (1)                     | (2)                     | (3)                     |
|-------------------------------------------------|-------------------------|-------------------------|-------------------------|
| <b>Mean parameters</b>                          |                         |                         |                         |
| Carbon emission reduction 95%                   | 3.8920***<br>(1.3352)   | 4.5133***<br>(1.4170)   | 3.8073***<br>(1.4372)   |
| Lease payment to landowners                     | 0.1358<br>(0.4379)      | 0.1238<br>(0.4738)      | 0.1850<br>(0.4683)      |
| Medium quality farmland                         | -3.5326**<br>(1.4654)   | -2.2451<br>(1.5845)     | -2.7236*<br>(1.5695)    |
| High quality farmland                           | -17.9984***<br>(2.4984) | -14.9182***<br>(2.5861) | -15.5841***<br>(2.5207) |
| Carbon emission reduction 95% × Public official |                         | -4.0493<br>(3.7398)     |                         |
| Lease payment to landowners × Public official   |                         | 0.1367<br>(1.1995)      |                         |
| Medium quality farmland × Public official       |                         | -9.7437**<br>(4.2895)   |                         |
| High quality farmland × Public official         |                         | -23.0514**<br>(8.9690)  |                         |
| Carbon emission reduction 95% × Landowner       |                         |                         | 0.0200<br>(4.7492)      |
| Lease payment to landowners × Landowner         |                         |                         | -0.0125<br>(1.6195)     |
| Medium quality farmland × Landowner             |                         |                         | -9.9995<br>(6.2735)     |
| High quality farmland × Landowner               |                         |                         | -27.2427**<br>(13.7121) |
| <b>Standard deviation parameters</b>            |                         |                         |                         |
| Carbon emission reduction 95%                   | 1.4510***<br>(0.1316)   | 1.5787***<br>(0.1503)   | 1.5575***<br>(0.1412)   |
| Lease payment to landowners                     | 0.4399***<br>(0.0395)   | 0.4760***<br>(0.0449)   | 0.4719***<br>(0.0427)   |
| Medium quality farmland                         | 1.5472***<br>(0.1408)   | 1.6354***<br>(0.1539)   | 1.6396***<br>(0.1479)   |
| High quality farmland                           | 3.2422***<br>(0.3258)   | 3.2107***<br>(0.3275)   | 3.1691***<br>(0.3105)   |
| Log likelihood                                  | -2,499                  | -2,488                  | -2,495                  |
| AIC                                             | 5017.819                | 5006.684                | 5019.913                |
| BIC                                             | 5088.311                | 5112.422                | 5125.651                |
| Certainty level ≥ 3                             | Yes                     | Yes                     | Yes                     |
| Number of respondents                           | 765                     | 765                     | 765                     |
| Observations                                    | 8512                    | 8512                    | 8512                    |

Note: Mixed distribution modes (online Qualtrics survey and mail-based survey) were employed to enhance the response rate from public officials, resulting in 57 physical copy responses from public officials with the rest coming from the online mode. Among these 57 physical copy responses, 28 are also landowners. Models 1, 2, and 3 use the same specifications as Column (2) in Table 3, Column (1) in Table 4, and Column (2) in Table 4, respectively, but exclude 57 responses from public officials via physical copies. Robust standard errors clustered at the individual level in parentheses, \*  $p < 0.1$ , \*\*  $p < 0.05$ , \*\*\*  $p < 0.01$ .

Table A10: Random Parameter Logit Models in Willingness-to-Pay Space: Excluding Non-supporters

| Variable                             | (1)                     |
|--------------------------------------|-------------------------|
| <b>Mean parameters</b>               |                         |
| Carbon emission reduction 95%        | 3.8042***<br>(1.3098)   |
| Lease payment to landowners          | 0.3076<br>(0.4275)      |
| Medium quality farmland              | -3.8201***<br>(1.4304)  |
| High quality farmland                | -18.3496***<br>(2.4029) |
| <b>Standard deviation parameters</b> |                         |
| Carbon emission reduction 95%        | 1.4245***<br>(0.1253)   |
| Lease payment to landowners          | 0.4325***<br>(0.0378)   |
| Medium quality farmland              | 1.5234***<br>(0.1353)   |
| High quality farmland                | 3.2154***<br>(0.3097)   |
| Log likelihood                       | -2,476                  |
| AIC                                  | 4971.764                |
| BIC                                  | 5042.188                |
| Certainty level $\geq 3$             | Yes                     |
| Number of respondents                | 816                     |
| Observations                         | 8454                    |

Note: Robust standard errors clustered at the individual level in parentheses, \*  $p < 0.1$ , \*\*  $p < 0.05$ , \*\*\*  $p < 0.01$ .
